# Supplementary material for: Engaging Older Adults in Health Care Decision-Making: A Realist Synthesis
Source: Springer Nature journal article supplement (doi:10.1007/s40271-016-0168-x), 2016-04-05
Supplement: MOESM1 [file 24126898]

Elliott et al., Engaging Older Adults in Health Care Decision-Making: A Realist Synthesis

| Ref ID | Author           | Date | Focus/ Purpose of Article                                                                                                          | Type of Evidence                    | Results                                                                                                         | Setting                                 | Population |           |                                                                | Older Adult Focus | Engagement Strategy                                                                     | Picker PCC Domains    | Spectrum Level | Barriers                                                                             | Facilitators                                                                                                                                                                                                                                                                                                                                                                                                                                                                                                  | C                                                                                                                                                                                                                                                                                                                                                                                   | M                                         | O                    |              |
|--------|------------------|------|------------------------------------------------------------------------------------------------------------------------------------|-------------------------------------|-----------------------------------------------------------------------------------------------------------------|-----------------------------------------|------------|-----------|----------------------------------------------------------------|-------------------|-----------------------------------------------------------------------------------------|-----------------------|----------------|--------------------------------------------------------------------------------------|---------------------------------------------------------------------------------------------------------------------------------------------------------------------------------------------------------------------------------------------------------------------------------------------------------------------------------------------------------------------------------------------------------------------------------------------------------------------------------------------------------------|-------------------------------------------------------------------------------------------------------------------------------------------------------------------------------------------------------------------------------------------------------------------------------------------------------------------------------------------------------------------------------------|-------------------------------------------|----------------------|--------------|
|        |                  |      |                                                                                                                                    |                                     |                                                                                                                 |                                         | Culture    | Sub group | Patient/ Disease                                               |                   |                                                                                         |                       |                |                                                                                      |                                                                                                                                                                                                                                                                                                                                                                                                                                                                                                               |                                                                                                                                                                                                                                                                                                                                                                                     |                                           |                      |              |
| 25     | Armstrong et al. | 2013 | Characterize patient involvement in three improvement projects and to identify strengths and weaknesses of contrasting approaches. | Qualitative (ethnographic approach) | Identified specific strategies that can be used to help ensure that patient involvement works most effectively: | Secondary care, primary care, community | UK         | N/A       | Lung cancer, abdominal aortic aneurysm, chronic kidney disease | No                | Collection of patient experience data; focus groups; patient and service advisory group | Patients' Preferences | Involve        | Acknowledge that barriers might exist, but did not mention what barriers might exist | 1) Early involvement, 2) effective communication channels, 3) non-hierarchical structure, 4) a clearly defined role, 5) clarity on rationale for patient involvement, 6) identifying the right model to achieve the desired outcomes (no one-size-fits-all), 7) clear roles and responsibilities for patients, 8) involvement that is meaningful                                                                                                                                                              | patient level; clinic                                                                                                                                                                                                                                                                                                                                                               | clarifying roles; effective communication | engagement           |              |
| 16     | Muthalagappan    | 2013 | Explore the ethical background behind shared decision-making and whether it is genuinely in the patients' best interests           | Quantitative                        | Patients who are engaged in decision-making are more motivated and their clinical outcomes are greatly improved | Community                               | N/A        | N/A       | End stage renal disease and comorbidities                      | Yes               | Shared decision-making                                                                  | Patients' Preferences | Collaborate    | Involve                                                                              | 1) Paternalistic physician practice, 2) lack of education skills, 3) difficulty assimilating complex information, 4) need to individualize the correct balance in the amount of information, 5) patients and families may feel abandoned if they are not supported after deciding not to have dialysis, 6) patients may prefer not to be involved (needs to be tailored), 7) language barriers, 8) low health literacy, 9) emotionally draining for patient and family, 10) time-consuming and 11) burdensome | Components of shared decision making are 1) truth telling, 2) sufficient information, 3) access to information, 4) physician-patient relationship, 5) good communication, 6) relevant evidence, 7) trust, 8) pros and cons, 9) all options presented, and 10) ideas, concerns and expectations. The 2 discussed in detail were truth telling and the physician-patient relationship | patient, provider, clinic                 | trust; communication | relationship |
